# Supplementary material for: Dual-electrocatalysis behavior of star-like zinc–cobalt-sulfide decorated with cobalt–molybdenum-phosphide in hydrogen and oxygen evolution reactions
Source: Royal Society of Chemistry journal article supplement (doi:10.1039/d1nr04374a), 2021-01-01
Supplement: d1nr04374a1.pdf [file d1nr04374a1.pdf]

## Supporting Information

### **Dual-Electrocatalysis Behavior of Star-like Zinc-Cobalt-Sulfide Decorated with Cobalt-Molybdenum-Phosphide in Hydrogen and Oxygen Evolution Reactions**

Maryam Shamloofard<sup>a</sup>, Saeed Shahrokhian<sup>a,b\*</sup>

*<sup>a</sup>Department of Chemistry, Sharif University of Technology, Tehran 11155-9516, Iran*

*<sup>b</sup>Institute for Nanoscience and Technology, Sharif University of Technology, Tehran, Iran*

---

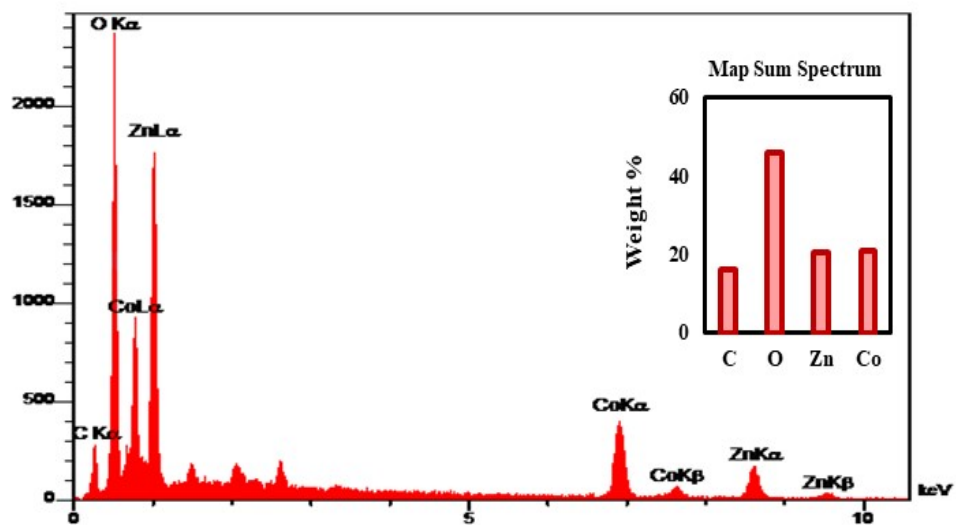

Figure S1. Energy-dispersive X-ray of the Zn-Co precursor.

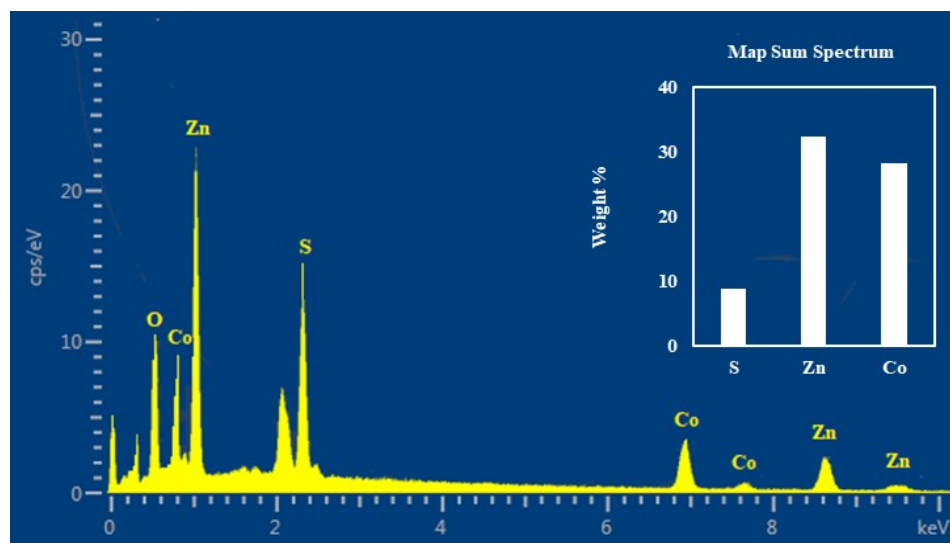

**Figure S2.** Energy-dispersive X-ray of the Zn-Co-S.

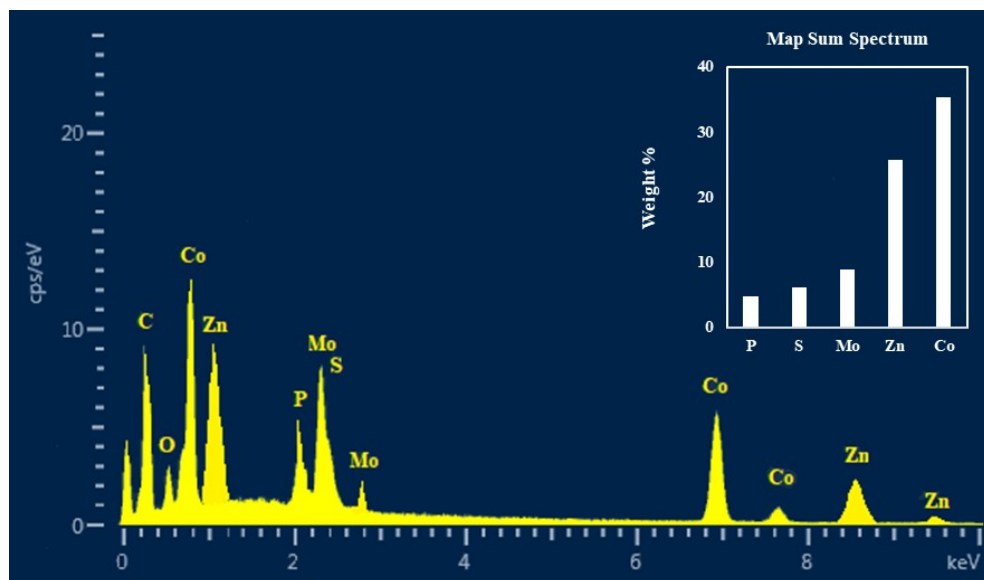

**Figure S3.** Energy-dispersive X-ray of the Co-Mo-P (3)/Zn-Co-S.

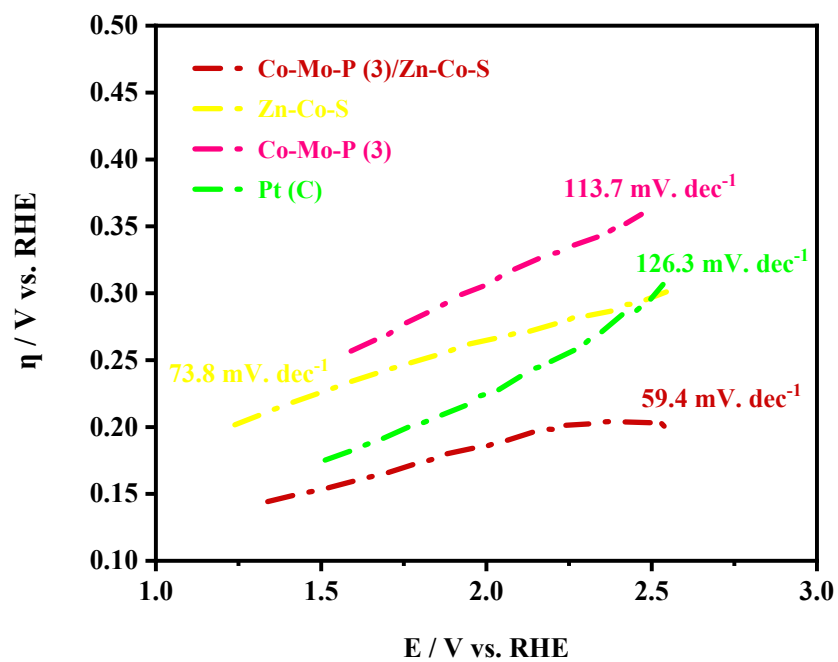

**Figure S4.** Tafel plots for catalysts at the high overpotentials.

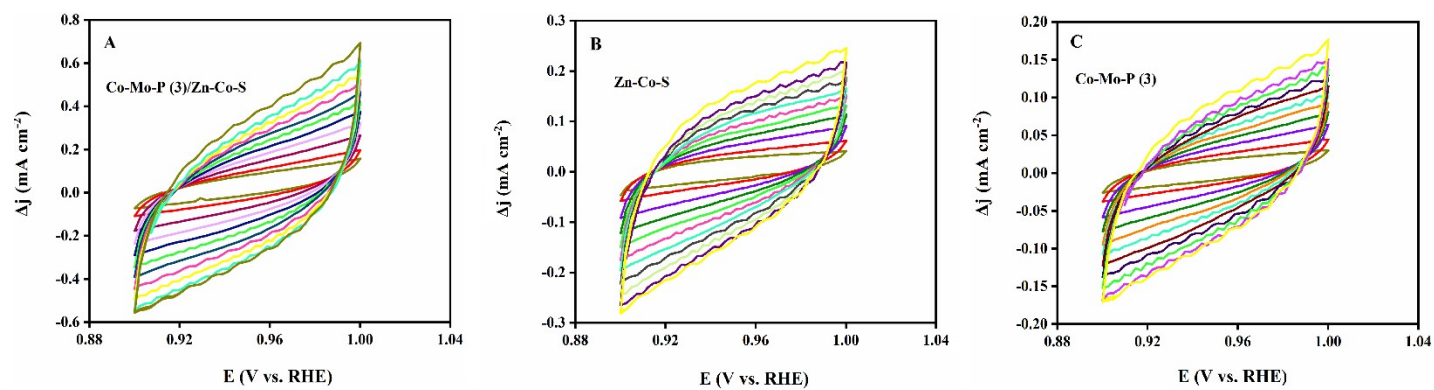

**Figure S5.** CV curves of catalysts in 1M KOH with different scan rates (5-100  $\text{mV s}^{-1}$ )

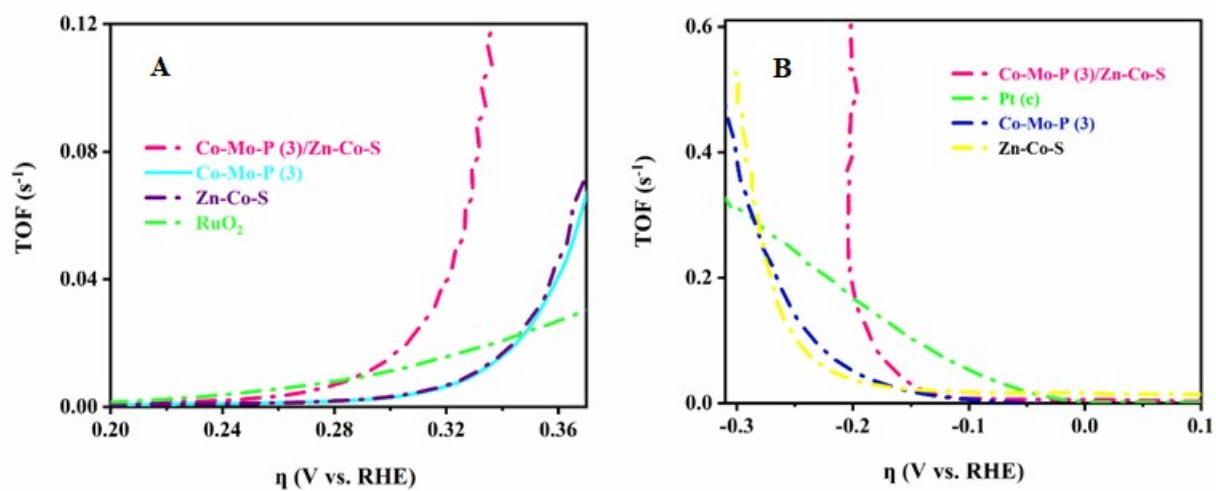

**Figure S6.** The calculated TOF values for **(A)** OER, and **(B)** HER.

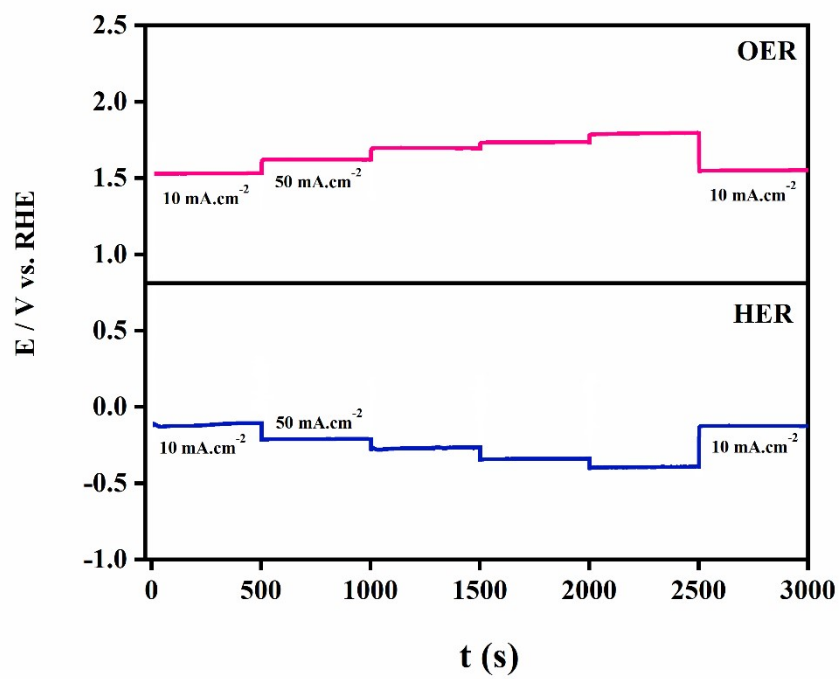

**Figure S7.** The multi-current step test over Co-Mo-P (3)/Zn-Co-S for OER and HER.

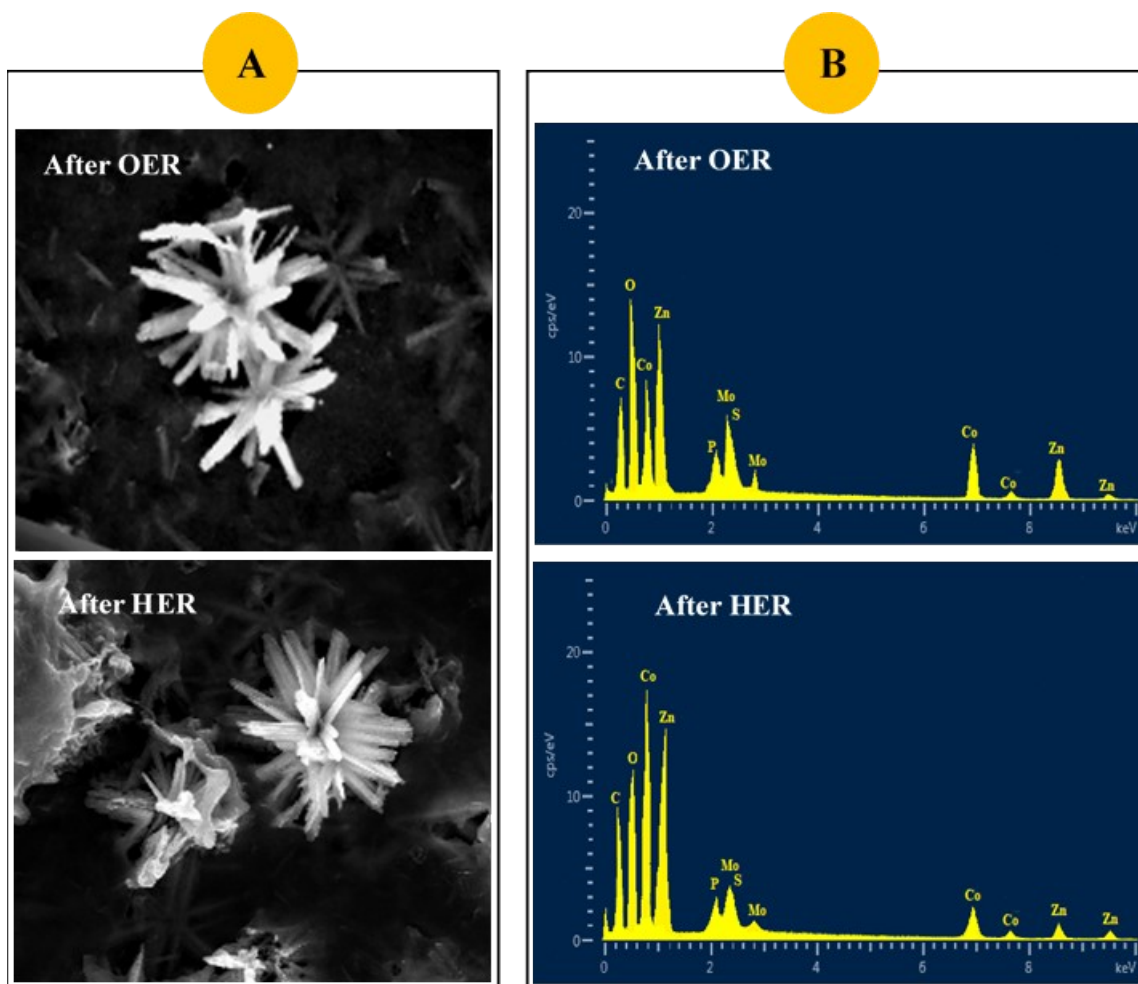

**Figure S8.** (A) The FE-SEM images, and (B) Energy-dispersive X-ray of the Co-Mo-P (3)/Zn-Co-S after OER and HER tests.

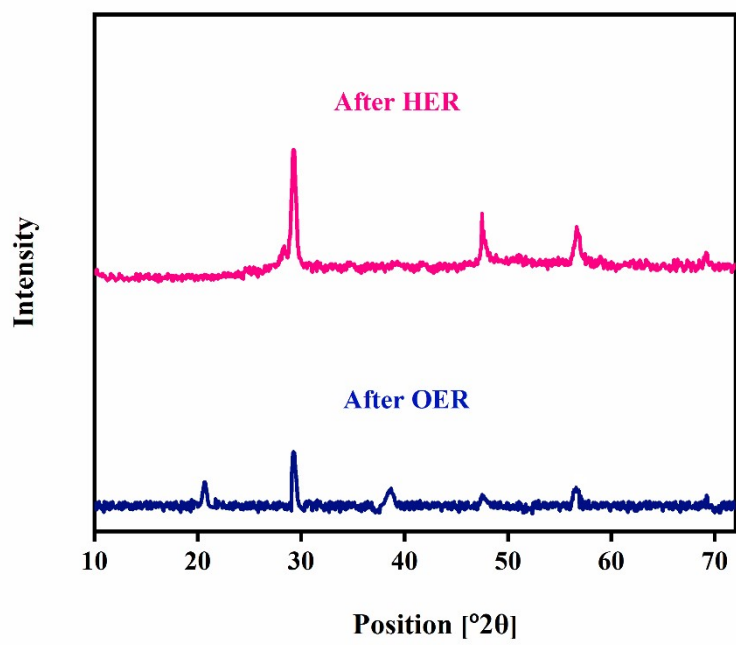

**Figure S9.** The XRD patterns of the Co-Mo-P (3)/Zn-Co-S after OER and HER.

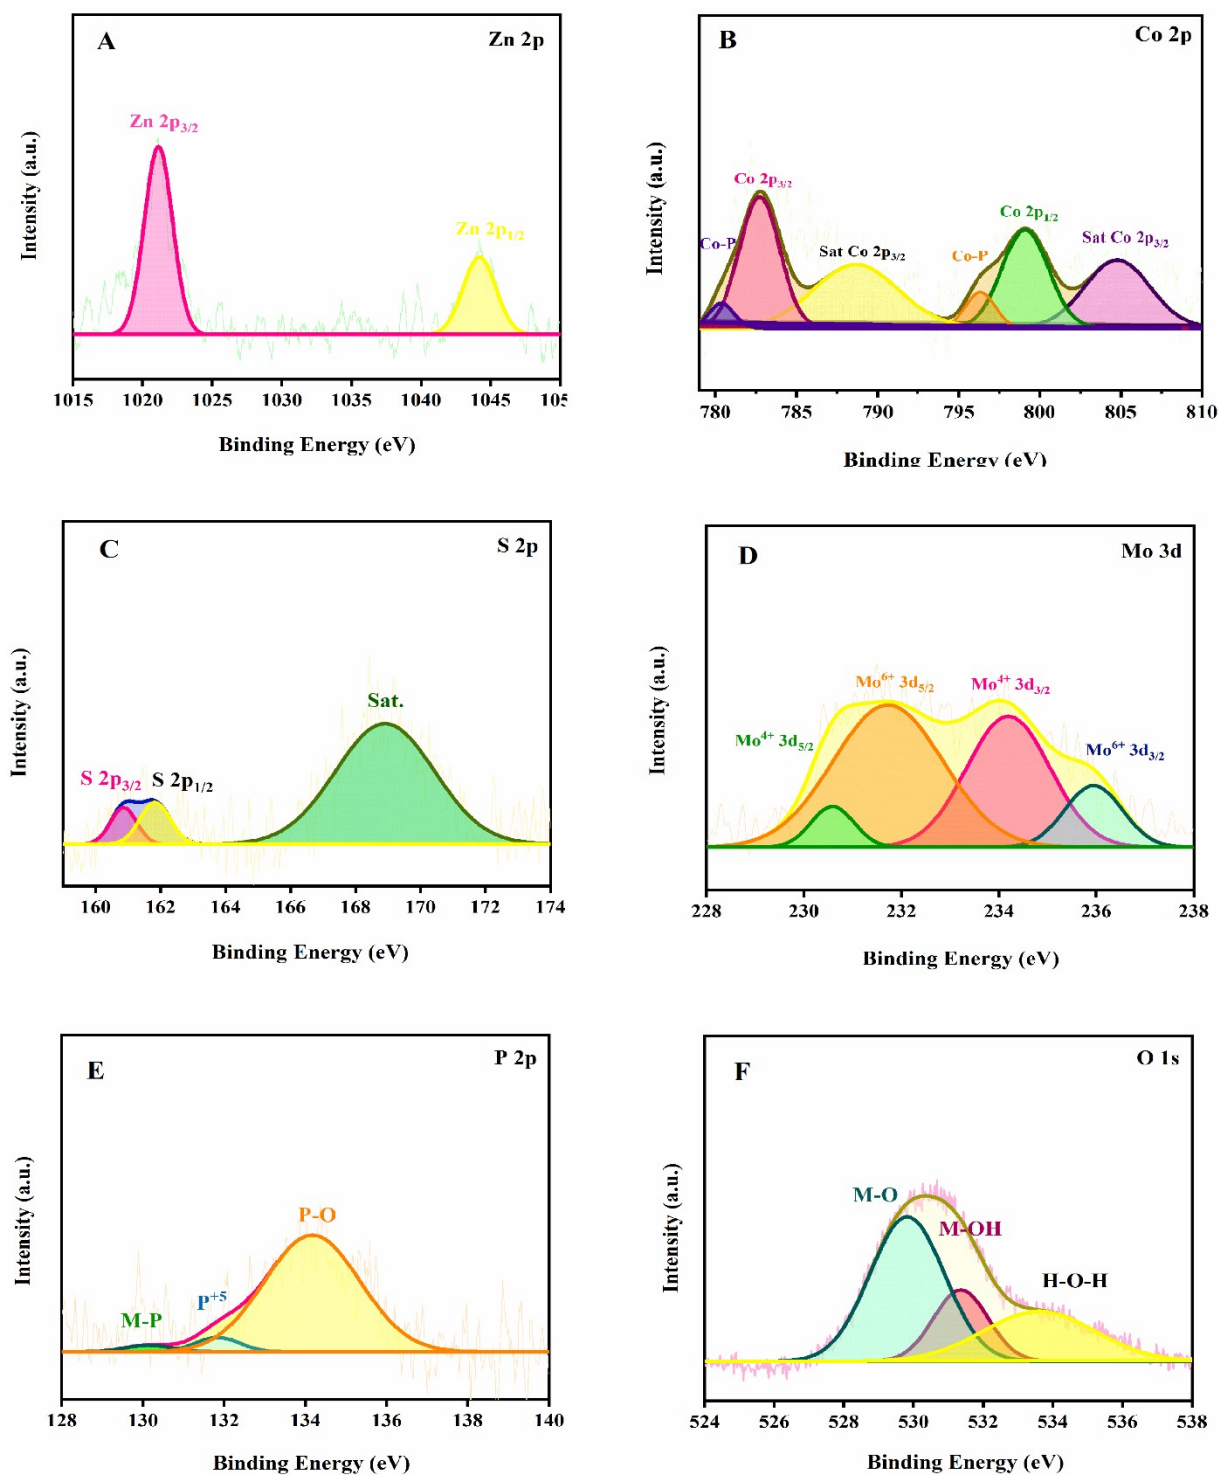

**Figure S9.** The XPS of the Co-Mo-P (3)/Zn-Co-S after OER test.

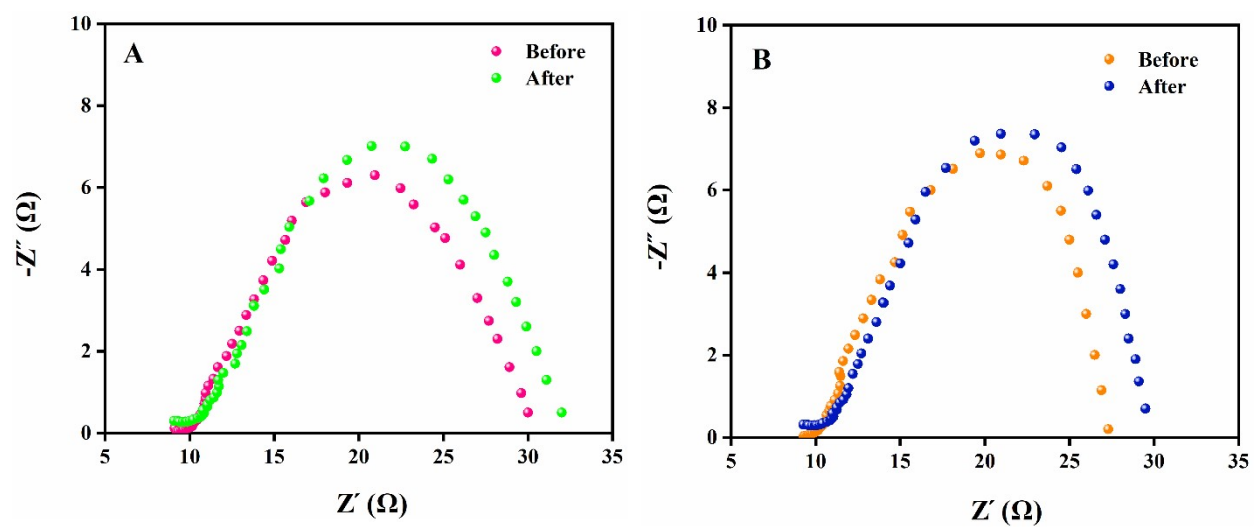

**Figure S11.** EIS Nyquist plots recorded for Co-Mo-P (3)/Zn-Co-S catalyst after **(A)** OER, and **(B)** HER tests.

**Table S1.** Electrochemical parameters of the Zn-Co precursor, Zn-Co-A, Zn-Co-O, and Zn-Co-S catalysts toward OER in 1 M KOH solution.

| Catalysts       | $\eta$ at $j = 10$       | $\eta$ at $j = 50$       | $j$ at $\eta = 0.34$      |
|-----------------|--------------------------|--------------------------|---------------------------|
|                 | $\text{mA cm}^{-2}$ (mV) | $\text{mA cm}^{-2}$ (mV) | V ( $\text{mA cm}^{-2}$ ) |
| Zn-Co precursor | 377                      | -                        | 3.95                      |
| Zn-Co-O         | 394                      | 450                      | 1.04                      |
| Zn-Co-A         | 372                      | 413                      | 2.9                       |
| Zn-Co-S         | 321                      | 355                      | 22.79                     |

**Table S2.** Electrochemical parameters of the Zn-Co precursor, Zn-Co-A, Zn-Co-O, and Zn-Co-S catalysts toward HER in 1 M KOH solution.

| Catalysts       | $\eta$ at $j = 10$       | $\eta$ at $j = 50$       | $j$ at $\eta = 0.2$       |
|-----------------|--------------------------|--------------------------|---------------------------|
|                 | $\text{mA cm}^{-2}$ (mV) | $\text{mA cm}^{-2}$ (mV) | V ( $\text{mA cm}^{-2}$ ) |
| Zn-Co precursor | 478                      | 550                      | 2.29                      |
| Zn-Co-O         | 414                      | 467                      | 1.12                      |
| Zn-Co-A         | 303                      | 383                      | 2.56                      |
| Zn-Co-S         | 176                      | 242                      | 17.32                     |

**Table S3.** Electrochemical parameters of the Co-P, Co-Mo-P (1), Co-Mo-P (2), Co-Mo-P (3), and Co-Mo-P (4) catalysts toward OER in 1 M KOH solution.

| Catalysts   | $\eta$ at $j = 10$       | $\eta$ at $j = 50$       | $j$ at $\eta = 0.34$      |
|-------------|--------------------------|--------------------------|---------------------------|
|             | $\text{mA cm}^{-2}$ (mV) | $\text{mA cm}^{-2}$ (mV) | V ( $\text{mA cm}^{-2}$ ) |
| Co-P        | 380                      | 416                      | 1.73                      |
| Co-Mo-P (1) | 378                      | 411                      | 1.85                      |
| Co-Mo-P (2) | 357                      | 398                      | 5.05                      |
| Co-Mo-P (3) | 348                      | 381                      | 6.82                      |
| Co-Mo-P (4) | 367                      | 402                      | 3.01                      |

**Table S4.** Electrochemical parameters of the Co-P, Co-Mo-P (1), Co-Mo-P (2), Co-Mo-P (3), and Co-Mo-P (4) catalysts toward HER in 1 M KOH solution.

| Catalysts   | $\eta$ at $j = 10$       | $\eta$ at $j = 50$       | $j$ at $\eta = 0.2$       |
|-------------|--------------------------|--------------------------|---------------------------|
|             | $\text{mA cm}^{-2}$ (mV) | $\text{mA cm}^{-2}$ (mV) | V ( $\text{mA cm}^{-2}$ ) |
| Co-P        | 334                      | 425                      | 2.57                      |
| Co-Mo-P (1) | 309                      | 362                      | 2.70                      |
| Co-Mo-P (2) | 288                      | 336                      | 3.10                      |
| Co-Mo-P (3) | 171                      | 268                      | 14.85                     |
| Co-Mo-P (4) | 250                      | 312                      | 5.75                      |

**Table S5A.** Comparison of OER activity data with some representative non-noble catalysts.

| Catalyst                                        | Electrolyte | J (mA cm <sup>-2</sup> ) | $\eta$ (mV) | Tafel slope<br>(mV dec <sup>-1</sup> ) | Ref.      |
|-------------------------------------------------|-------------|--------------------------|-------------|----------------------------------------|-----------|
| <b>Co<sub>9</sub>S<sub>8</sub>/Zn-Co-S</b>      | 1 M KOH     | 10                       | 292         | 52                                     | 1         |
| <b>CoP(MoP)-<br/>CoMoO<sub>3</sub>@CN</b>       | 1 M KOH     | 10                       | 296         | 105                                    | 2         |
| <b>Co<sub>5</sub>Mo<sub>x</sub>P<br/>NSs@NF</b> | 1 M KOH     | 10                       | 270         | 54.4                                   | 3         |
| <b>CoMoPx</b>                                   | 1 M KOH     | 10                       | 305         | 50                                     | 4         |
| <b>Co-Mo-P (3)/Zn-<br/>Co-S</b>                 | 1 M KOH     | 10                       | 273         | 41                                     | This work |

**Table S5B.** Comparison of HER activity data with some representative non-noble catalysts.

| Catalyst                                        | Electrolyte | J (mA cm <sup>-2</sup> ) | $\eta$ (mV) | Tafel slope<br>(mV dec <sup>-1</sup> ) | Ref.      |
|-------------------------------------------------|-------------|--------------------------|-------------|----------------------------------------|-----------|
| <b>CoP(MoP)-<br/>CoMoO<sub>3</sub>@CN</b>       | 1 M KOH     | 10                       | 198         | 72                                     | 2         |
| <b>Co<sub>5</sub>Mo<sub>x</sub>P<br/>NSs@NF</b> | 1 M KOH     | 10                       | 173         | 218.6                                  | 3         |
| <b>CoP3/CoMoP</b>                               | 1 M KOH     | 10                       | 125         | 61.1                                   | 5         |
| <b>ZnCo/NC@MoS<sub>2</sub></b>                  | 1 M KOH     | 10                       | 130         | 60.2                                   | 6         |
| <b>Co-Mo-P (3)/Zn-<br/>Co-S</b>                 | 1 M KOH     | 10                       | 120         | 61.7                                   | This work |

## References

- 1 Z. Chen, M. Liu, R. Wu, *J. Catal.*, 2018, **361**, 322–330.
- 2 L. Yu, Y. Xiao, C. Luan, J. Yang, H. Qiao, Y. Wang, X. Zhang, X. Dai, Y. Yang, H. Zhao, *ACS Appl. Mater. Interfaces*, 2019, **11**, 6890–6899.
- 3 Y. Zhang, Q. Shao, S. Long, X. Huang, *Nano Energy*, 2018, **45**, 448–455.
- 4 H. Huang, A. Cho, S. Kim, H. Jun, A. Lee, J. Han, J. Lee, *Adv. Funct. Mater.*, 2020, **30**, 2003889–2003898.
- 5 D. Jiang, Y. Xu, R. Yang, D. Li, S. Meng, M. Chen, *ACS Sustainable Chem. Eng.*, 2019, **7**, 9309–9317.
- 6 J. Feng, H. Zhou, D. Chen, T. Bian, A. Yuan, *Electrochim. Acta*, 2020, **331**, 135445–135454.
